# Supplementary material for: Mesoporous graphitic carbon nitride as a heterogeneous catalyst for photoinduced copper(i)-catalyzed azide–alkyne cycloaddition
Source: Royal Society of Chemistry journal article supplement (doi:10.1039/c4ra09954k), 2014-01-01
Supplement: c4ra09954k1.pdf [file c4ra09954k1.pdf]

## SUPPORTING INFORMATION

# Mesoporous graphitic carbon nitride as a heterogeneous catalyst for photoinduced copper(I)-catalyzed azide-alkyne cycloaddition

Sajjad Dadashi-Silab, Baris Kiskan, Markus Antonietti, and Yusuf Yagci\*

## EXPERIMENTAL

### Materials

Benzyl bromide (Aldrich, 98%), phenylacetylene (Aldrich, 98%), 9-anthracenemethanol (Aldrich, 97%), ethyl 2-bromopropionate (Aldrich, 99%), 3-bromo-2-methylpropene (Aldrich, 97%), 1-bromooctane (Fluka, 98%), aniline (Aldrich, 99.5%), 4-fluoroaniline (Aldrich, 99%), 4-nitro aniline (Fluka, 98%), 2-ethynylpyridine (Aldrich, 98%), 3-ethynylthiophene (Aldrich, 96%), propargyl acrylate (Aldrich, 98%), propargyl alcohol (Aldrich, 99%), propargylamine (Aldrich, 98%), sodium azide ( $\text{NaN}_3$ , Panreac, 99%), and copper(II) chloride ( $\text{Cu}^{\text{II}}\text{Cl}_2$ , Acros Organics, 99%) were used as received without any further purification. *N,N,N',N'',N''*-pentamethyldiethylenetriamine (PMDETA, Aldrich, 99%) was purified by passing through basic alumina ( $\text{Al}_2\text{O}_3$ ) prior to use. All solvents were purchased from Merck and used as received. Sodium nitrite ( $\text{NaNO}_2$ , Carlo Erba), magnesium sulfate ( $\text{MgSO}_4$ , Alfa Aesar, 99.5%), sodium bicarbonate ( $\text{NaHCO}_3$ , Aldrich,  $\geq 99.7\%$ ), cyanamide (Aldrich, 99%), ammonium hydrogen difluoridewere ( $\text{NH}_4\text{HF}_2$ , Wako Chemicals, 95%), and  $\text{SiO}_2$  particles in water (Ludox HS-40, Aldrich, 40 wt% suspension in  $\text{H}_2\text{O}$ ) were used as received.

### Instrumentation

$^1\text{H}$  NMR spectra were recorded in  $\text{CDCl}_3$  with  $\text{Si}(\text{CH}_3)_4$  as an internal standard at 500 MHz on a Agilent VNMR5 500 spectrometer at room temperature (125 MHz for  $^{13}\text{C}$  NMR).

Fourier transform infrared (FTIR) spectra were recorded on PerkinElmer FTIR Spectrum One spectrometer with an ATR accessory (ZnSe, PikeMiracle accessory) and cadmium telluride (MCT) detector.

Photodifferential scanning calorimetry (photo-DSC) measurements were carried out by means of a modified PerkinElmer Diamond DSC equipped with a Polilight PL400 Forensic Plus light source between 350 and 500 nm. A uniform UV light intensity was delivered across the DSC cell to the sample and reference pans. The measurements were carried out in an isothermal mode at 25 °C.

### Preparation of Mesoporous Graphitic Carbon Nitride (mpg-C<sub>3</sub>N<sub>4</sub>)<sup>1</sup>

A unity mass ratio of silica to cyanamide was used to synthesize mpg-C<sub>3</sub>N<sub>4</sub>. Cyanamide (20 g, 0.475 mol) was dissolved in a 40 wt% dispersion of 12 nm SiO<sub>2</sub> particles in water (50 g) with stirring at 353 K for about 3 h to evaporate the water. The resulting white powder was then heated at a rate of 2.3 K min<sup>-1</sup> over 4 h to reach a temperature of 823 K, and then held at this temperature for an additional 4 h. The resulting brown-yellow powder was stirred in 200 mL of 4 M NH<sub>4</sub>HF<sub>2</sub> for 2 h, followed by filtration and washing with 100 mL of H<sub>2</sub>O and 50 mL of ethanol. This washing cycle was repeated to completely remove the silica template. The powder was then stirred in 200 mL of H<sub>2</sub>O for 2 h, then filtered and washed with H<sub>2</sub>O and ethanol. Finally, the powders were dried at 393 K overnight. The yield of mpg-C<sub>3</sub>N<sub>4</sub> was about 40%, based on carbon content.

### General Procedures for the Preparation of Azide Components

#### General procedure A:<sup>2</sup>

To a solution of the corresponding bromide compound (15 mmol, 1.0 eq) in 200 mL of DMSO was added sodium azide in excess (1.5 eq). The solution was stirred for at least 2 h at room temperature. Water (200 mL) was added to the mixture and after cooling down to room temperature, the aqueous solution was extracted with diethyl ether (3 × 100 mL). The organic layers were merged and washed with water (2 × 100 mL) and brine (100 mL). After drying over MgSO<sub>4</sub>, the ether was removed under reduced pressure to yield azides **1a-b** and **1f-h**.

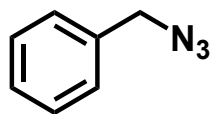

**Benzyl azide (1a).** From benzyl bromide. Yellow oil. Yield 96%. <sup>1</sup>H NMR (500 MHz, CDCl<sub>3</sub>): δ 7.43-7.34 (m, 5H), 4.36 (s, 1H); <sup>13</sup>C NMR (125 MHz, CDCl<sub>3</sub>): δ 135.4, 128.8, 128.3, 128.2, 54.8.

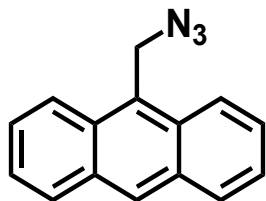

**9-(Azidomethyl)anthracene (1b).** From 9-(bromomethyl)anthracene. Yellow solid. Yield 95%.  $^1\text{H}$  NMR (500 MHz,  $\text{CDCl}_3$ ):  $\delta$  8.52 (s, 1H), 8.31 (d, 2H), 8.07 (d, 2H), 7.63-7.59 (m, 2H), 7.54-7.51 (m, 2H), 5.35 (s, 2H);  $^{13}\text{C}$  NMR (125 MHz,  $\text{CDCl}_3$ ):  $\delta$  131.4, 130.7, 129.3, 128.7, 129.0, 126.8, 125.8, 125.2, 123.5, 46.4.

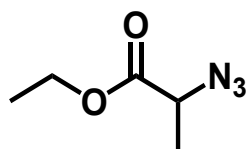

**Ethyl 2-azidopropanoate (1f).** From ethyl 2-bromopropionate. Colorless oil. Yield 97%.  $^1\text{H}$  NMR (500 MHz,  $\text{CDCl}_3$ ):  $\delta$  4.24 (q, 2H), 3.91 (q, 1H), 1.46 (d, 3H), 1.30 (t, 3H);  $^{13}\text{C}$  NMR (125 MHz,  $\text{CDCl}_3$ ):  $\delta$  170.9, 128.3, 61.7, 57.3, 16.7, 14.1.

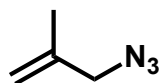

**3-Azido-2-methylpropene (1g).** From 3-bromo-2-methylpropene. Yellow oil. Yield 86%.  $^1\text{H}$  NMR (500 MHz,  $\text{CDCl}_3$ ):  $\delta$  4.98 (s, 1H), 4.86 (s, 1H), 3.48 (s, 1H), 1.83 (s, 3H);  $^{13}\text{C}$  NMR (125 MHz,  $\text{CDCl}_3$ ):  $\delta$  140.7, 116.2, 57.3, 22.3.

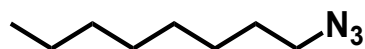

**1-Azido-octane (1h).** From 1-bromooctane. Pale yellow oil. Yield 93%.  $^1\text{H}$  NMR (500 MHz,  $\text{CDCl}_3$ ):  $\delta$  3.26 (t, 2 H), 1.68-1.20 (m, 12H), 0.89 (t, 3H);  $^{13}\text{C}$  NMR (125 MHz,  $\text{CDCl}_3$ ):  $\delta$  51.5, 31.7, 29.1, 28.8, 26.7, 22.6, 15.2, 14.0.

### General procedure B:<sup>3</sup>

The corresponding aniline derivative (15 mmol, 1 eq.) was added to 80 mL of hydrochloric acid (17%) at room temperature followed by drop wise addition of ethanol to obtain a clear solution. The solution was cooled to 0 °C and NaNO<sub>2</sub> (1.5 eq.) was added in small portions. After stirring at 0 °C for 30 minutes, NaN<sub>3</sub> (1.5 eq.) was slowly added and the mixture was stirred for further 2 h at room temperature. The reaction mixture was extracted with diethyl ether (3 × 100 mL) and the combined organic fractions were washed with saturated NaHCO<sub>3</sub> solution (3 × 50 mL) and with brine (50 mL). After drying over MgSO<sub>4</sub>, the ether was removed under reduced pressure to obtain azides **1c-e**.

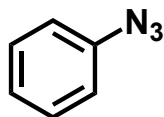

**Phenyl azide (1c).** From aniline. Yellow oil. Yield 93%. <sup>1</sup>H NMR (500 MHz, CDCl<sub>3</sub>): δ 7.38-7.35 (m, 2H), 7.17-7.14 (m, 1H), 7.07-7.05 (m, 2H); <sup>13</sup>C NMR (125 MHz, CDCl<sub>3</sub>): δ 140.0, 129.7, 124.8, 119.0.

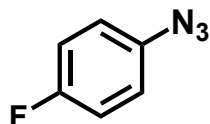

**1-Azido-4-fluorobenzene (1d).** From 4-fluoroaniline. Orange oil. Yield 91%. <sup>1</sup>H NMR (500 MHz, CDCl<sub>3</sub>): δ 7.08-7.03 (m, 2H), 7.01-6.97 (m, 2H); <sup>13</sup>C NMR (125 MHz, CDCl<sub>3</sub>): δ 160.9, 158.9, 135.8, 120.2, 116.7, 116.5.

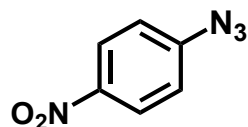

**1-Azido-4-nitrobenzene (1e).** From 4-nitro aniline. Orange solid. Yield 87%.  $^1\text{H}$  NMR (500 MHz,  $\text{CDCl}_3$ ):  $\delta$  8.26-8.23 (m, 2H), 7.16-7.13 (m, 2H);  $^{13}\text{C}$  NMR (125 MHz,  $\text{CDCl}_3$ ):  $\delta$  146.8, 144.6, 125.6, 119.4.

### General Procedure for the Preparation of 1,4-Disubstituted Triazoles

In a Pyrex tube  $\text{Cu}^{\text{II}}\text{Cl}_2$  (6.75 mg, 0.05 mmol) and PMDETA (10.5  $\mu\text{L}$ , 0.10 mmol) were dissolved in 3 mL of MeCN. To the mixture were added 1 mmol azide, 1 mmol alkyne, and 20 mg of mpg- $\text{C}_3\text{N}_4$ . The mixture was then irradiated in a Rayonet photoreactor equipped with 18 lamps (Philips 8 W BLB,  $\lambda_{\text{max}} > 350$  nm) with the light intensity of 25  $\text{mW cm}^{-2}$  at room temperature. After irradiation, mpg- $\text{C}_3\text{N}_4$  was separated and the resultant was purified by a short column chromatography.

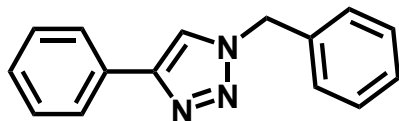

**4-Benzyl-1-phenyl-1H-1,2,3-triazole (3a).** White solid. Yield 98%.  $^1\text{H}$  NMR (500 MHz,  $\text{CDCl}_3$ ):  $\delta$  7.80 (d, 2H), 7.67 (s, 1H), 7.42-7.27 (m, 8H), 5.59 (s, 2H);  $^{13}\text{C}$  NMR (125 MHz,  $\text{CDCl}_3$ ):  $\delta$  148.2, 134.7, 130.6, 129.1, 128.8, 128.7, 128.2, 128.1, 125.7, 119.4, 54.2.

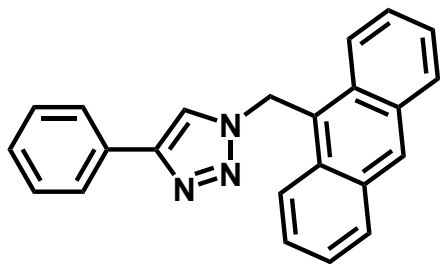

**1-(Anthracen-9-ylmethyl)-4-phenyl-1H-1,2,3-triazole (3b).** Yellow solid. Yield 99%.  $^1\text{H}$  NMR (500 MHz,  $\text{CDCl}_3$ ):  $\delta$  8.62 (s, 1H), 8.36 (d, 2H), 8.11 (d, 2H), 7.65-7.21 (m, 11H), 6.58 (s, 1H);  $^{13}\text{C}$  NMR (125 MHz,  $\text{CDCl}_3$ ):  $\delta$  147.8, 134.1, 131.4, 130.8, 130.7, 130.4, 129.9, 129.5, 129.3, 128.9, 128.61, 127.9, 127.2, 126.8, 125.57, 125.5, 125.2, 124.7, 123.7, 123.5, 123.0, 119.0, 46.6.

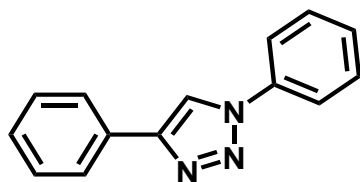

**1,4-Diphenyl-1H-1,2,3-triazole (3c).** Pale yellow oil. Yield 96%.  $^1\text{H}$  NMR (500 MHz,  $\text{CDCl}_3$ ):  $\delta$  8.21 (s, 1H), 7.94 (d, 2H), 7.81 (d, 2H), 7.58-7.34 (m, 6H);  $^{13}\text{C}$  NMR (125 MHz,  $\text{CDCl}_3$ ):  $\delta$  148.4, 137.0, 132.5, 130.3, 129.8, 128.9, 128.4, 125.9, 120.54, 117.56.

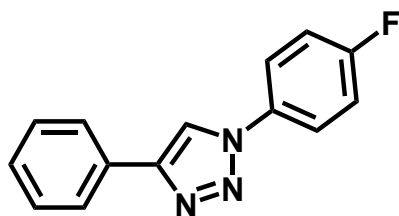

**1-(4-Fluorophenyl)-4-phenyl-1H-1,2,3-triazole (3d).** Pale yellow solid. Yield 99%.  $^1\text{H}$  NMR (500 MHz,  $\text{CDCl}_3$ ):  $\delta$  8.16 (s, 1H), 7.93-7.91 (d, 2H), 7.80-7.76 (d, 2H), 7.55-7.47 (m, 5H);  $^{13}\text{C}$  NMR (125 MHz,  $\text{CDCl}_3$ ):  $\delta$  162.1, 157.5, 132.5, 129.2, 128.9, 125.9, 122.5, 128.4, 125.8, 122.5, 121.8, 116.9.

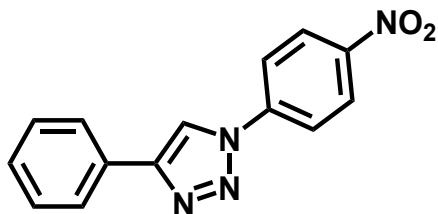

**1-(4-nitrophenyl)-4-phenyl-1H-1,2,3-triazole (3e).** Brownish solid. Yield 99%.  $^1\text{H}$  NMR (500 MHz,  $\text{CDCl}_3$ ):  $\delta$  8.43(s, 1H), 8.26-8.24 (m, 3H), 8.13-8.07 (m, 2H), 7.15 (m, 2H), 6.64 (m, 2H).  $^{13}\text{C}$  NMR (125 MHz,  $\text{CDCl}_3$ ):  $\delta$  155.1, 152.3, 149.5, 146.8, 144.5, 132.5, 126.3, 125.6, 124.9, 124.0, 119.4, 113.4.

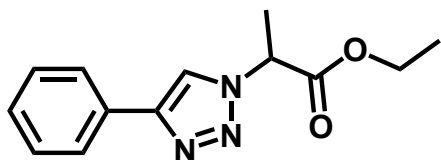

**Ethyl 2-(4-phenyl-1H-1,2,3-triazol-1-yl)propanoate (3f).** White solid. Yield 97%.  $^1\text{H}$  NMR (500 MHz,  $\text{CDCl}_3$ ):  $\delta$  7.98 (s, 1H), 7.86 (d, 2H), 7.44-7.41 (t, 2H), 7.35-7.31 (t, 1H), 5.50 (d, 1H), 4.26-4.21 (m, 2H), 1.88 (d, 3H), 1.29-1.26 (t, 3H);  $^{13}\text{C}$  NMR (125 MHz,  $\text{CDCl}_3$ ):  $\delta$  169.3, 147.8, 130.4, 128.9, 128.2, 125.8, 119.0, 116.4, 62.4, 58.4, 18.4, 14.0.

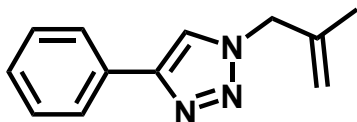

**1-(2-methylallyl)-4-phenyl-1H-1,2,3-triazole (3g).** Pale yellow solid. Yield 92%.  $^1\text{H}$  NMR (500 MHz,  $\text{CDCl}_3$ ):  $\delta$  8.21 (s, 1H), 7.58-7.33 (m, 5H), 5.1 (s, 2H), 4.98 (s, 2H), 1.75 (s, 3H);  $^{13}\text{C}$  NMR (125 MHz,  $\text{CDCl}_3$ ):  $\delta$  148.1, 139.4, 130.6, 128.8, 128.4, 128.1, 125.7, 120.5, 119.4, 115.5, 56.4, 19.7.



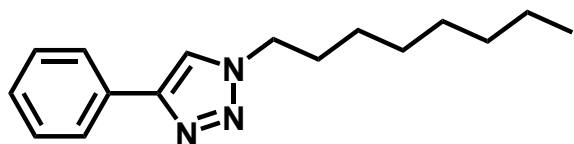

**1-Octyl-4-phenyl-1H-1,2,3-triazole (3h).** White solid. Yield 95%.  $^1\text{H}$  NMR (500 MHz,  $\text{CDCl}_3$ ):  $\delta$  7.85 (d, 2H), 7.75 (s, 1H), 7.45-7.32 (m, 3H), 4.40 (t, 2H), 1.96 (m, 2H), 1.36-1.27 (m, 10H), 0.89 (t, 3H);  $^{13}\text{C}$  NMR (125 MHz,  $\text{CDCl}_3$ ):  $\delta$  147.8, 137.7, 128.8, 128.0, 127.7, 119.3, 50.4, 31.7, 30.3, 28.9, 26.5, 22.6, 14.0.

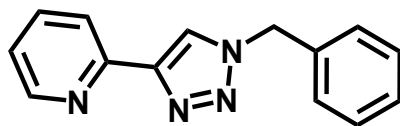

**2-(1-Benzyl-1H-1,2,3-triazol-4-yl)pyridine (3i).** Yellow solid. Yield 79%.  $^1\text{H}$  NMR (500 MHz,  $\text{CDCl}_3$ ):  $\delta$  8.53 (d, 1H), 8.20 (d, 1H), 8.05 (s, 1H), 7.78-7.75 (m, 1H), 7.40-7.33 (m, 5H), 7.22-7.19 (m, 1H);  $^{13}\text{C}$  NMR (125 MHz,  $\text{CDCl}_3$ ):  $\delta$  150.2, 149.3, 148.7, 136.9, 134.3, 129.2, 128.8, 128.3, 122.8, 121.9, 120.2, 54.4.

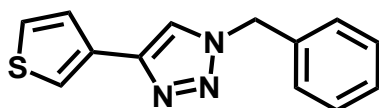

**1-Benzyl-4-(thiophen-3-yl)-1H-1,2,3-triazole (3j).** White solid. Yield 88%.  $^1\text{H}$  NMR (500 MHz,  $\text{CDCl}_3$ ):  $\delta$  7.65 (m, 1H), 7.56 (s, 1H), 7.43-7.35 (m, 5H), 7.30 (m, 2H), 5.57 (s, 2H);  $^{13}\text{C}$  NMR (125 MHz,  $\text{CDCl}_3$ ):  $\delta$  144.4, 134.6, 131.8, 129.1, 128.8, 128.0, 126.3, 125.8, 121.1, 119.3, 54.2.

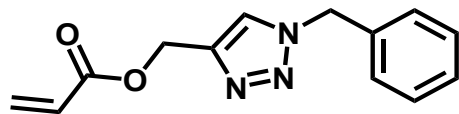

**(1-Benzyl-1*H*-1,2,3-triazol-4-yl)methyl acrylate (3k).** Pale yellow oil. Yield 99%. <sup>1</sup>H NMR (500 MHz, CDCl<sub>3</sub>): δ 7.54 (s, 1H), 7.39-7.27 (m, 5H), 6.44-6.40 (m, 1H), 6.14-6.09 (m, 1H), 5.97-5.94 (m, 1H), 5.53 (s, 2H), 5.28 (s, 2H); <sup>13</sup>C NMR (125 MHz, CDCl<sub>3</sub>): δ 166.1, 143.2, 134.24, 131.4, 129.1, 128.8, 128.1, 127.9, 126.6, 57.7, 54.2.

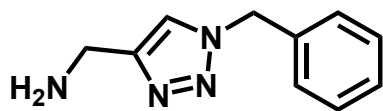

**(1-Benzyl-1*H*-1,2,3-triazol-4-yl)methanamine (3l).** White solid. Yield 87%. <sup>1</sup>H NMR (500 MHz, CDCl<sub>3</sub>): δ 8.30 (s, 1H), 7.51-7.26 (m, 5H), 5.55 (s, 2H), 4.78 (s, 2H), 1.38 (t, 2H); <sup>13</sup>C NMR (125 MHz, CDCl<sub>3</sub>): δ 150.0, 143.4, 128.7, 128.2, 116.5, 54.7, 43.5.

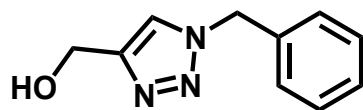

**(1-Benzyl-1*H*-1,2,3-triazol-4-yl)methanol (3m).** White solid. Yield 68%. <sup>1</sup>H NMR (500 MHz, CDCl<sub>3</sub>): δ 7.72 (s, 1H), 7.47-7.44 (d, 2H), 7.42-7.27 (m, 3H), 5.60 (s, 2H), 5.30 (s, 1H), 4.78 (s, 2H); <sup>13</sup>C NMR (125 MHz, CDCl<sub>3</sub>): δ 140.1, 134.7, 129.4, 128.4, 128.1, 121.4, 56.7, 51.7.

### Photocalorimetric Studies:

To a mixture of  $\text{Cu}^{\text{II}}\text{Cl}_2/\text{PMDETA}$  (0.025 mmol, 0.05 equiv) in 0.5 mL of acetonitrile were added benzyl azide **1a** (0.5 mmol, 1 eq), phenylacetylene **2a** (0.5 mmol, 1 eq) and mpg- $\text{C}_3\text{N}_4$  (10 mg). Approximately 15-20 mg of the solution was transferred into a photoDSC pan and irradiate in an isothermal mode at 25 °C. The thermograms (Figure S1) were drawn after baseline corrections. The real time conversions were calculated according to eq S1:

$$\text{Yield (\%)} = (\Delta H_t / \Delta H_0) \times 100 \quad (\text{eq S1}),$$

where,  $\Delta H_t$  is the total heat change till time  $t$  and  $\Delta H_0$  is the theoretical energy (14.9 kcal/mol).<sup>4</sup>

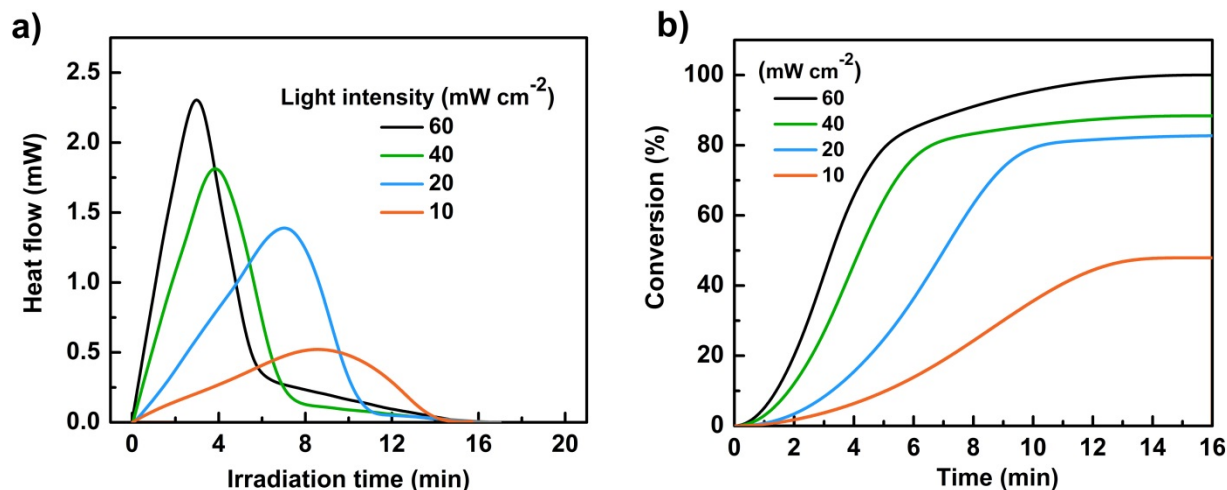

**Figure S1.** Calorimetric results of photoinduced CuAAC in the presence of mpg- $\text{C}_3\text{N}_4$  deploying benzyl azide (**1a**) and phenylacetylene (**2a**) as the model substitutes: a) effect of light intensity on photoclicking process and b) real time conversion in different light intensities

**Table S1.** Effect of different solvents on the photoinduced CuAAC using mpg-C<sub>3</sub>N<sub>4</sub><sup>a</sup>

| Entry | Solvent <sup>b</sup>            | Yield (%) <sup>c</sup> |
|-------|---------------------------------|------------------------|
| 1     | MeCN                            | 98                     |
| 2     | CH <sub>2</sub> Cl <sub>2</sub> | 98                     |
| 3     | THF                             | 96                     |
| 4     | DMF                             | 93                     |
| 5     | DMSO                            | 95                     |
| 6     | MeOH                            | 83                     |
| 7     | BuOH                            | 49                     |
| 8     | H <sub>2</sub> O                | 20                     |

<sup>a</sup> A mixture of benzyl azide (**1a**) and phenylacetylene (**2a**) in the presence of mpg-C<sub>3</sub>N<sub>4</sub> and Cu<sup>II</sup>Cl<sub>2</sub>/PMDETA was irradiated for 45 min, <sup>b</sup> MeCN: acetonitrile, CH<sub>2</sub>Cl<sub>2</sub>: dichloromethane, THF: tetrahydrofuran, DMF: dimethylformamide, DMSO: dimethyl sulfoxide, MeOH: methanol, BuOH: butanol, H<sub>2</sub>O: water, <sup>c</sup> Isolated yields.

Reusability of the photocatalyst mpg-C<sub>3</sub>N<sub>4</sub> was examined in the model reaction employing benzyl azide (**1a**) and phenylacetylene (**2a**) according to the general procedure described above for the click experiments. After each step, mpg-C<sub>3</sub>N<sub>4</sub> was separated and loaded for the next use applying fresh Cu(II).

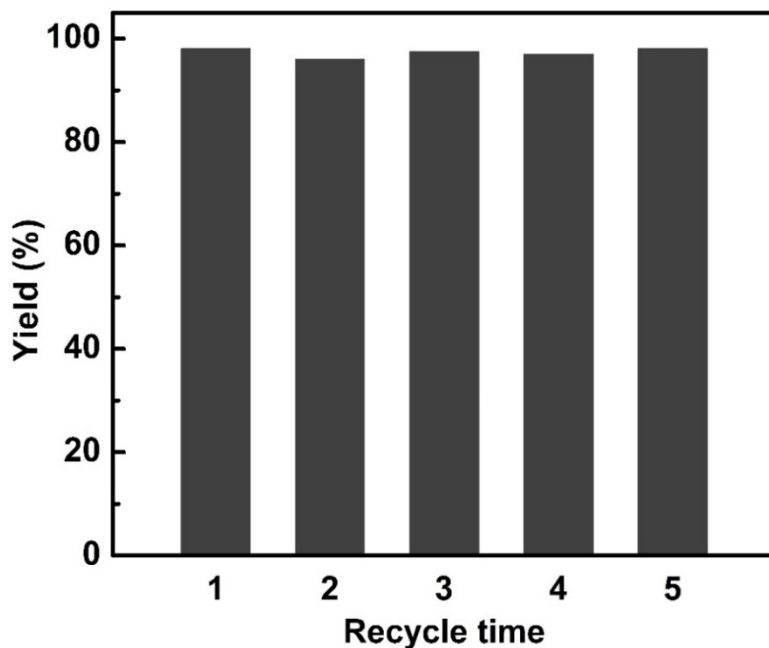

**Figure S2.** Repeated use of mpg-C<sub>3</sub>N<sub>4</sub> in photoclicking benzyl azide (**1a**) and phenylacetylene (**2a**) under the same experimental conditions as that of the model reaction.

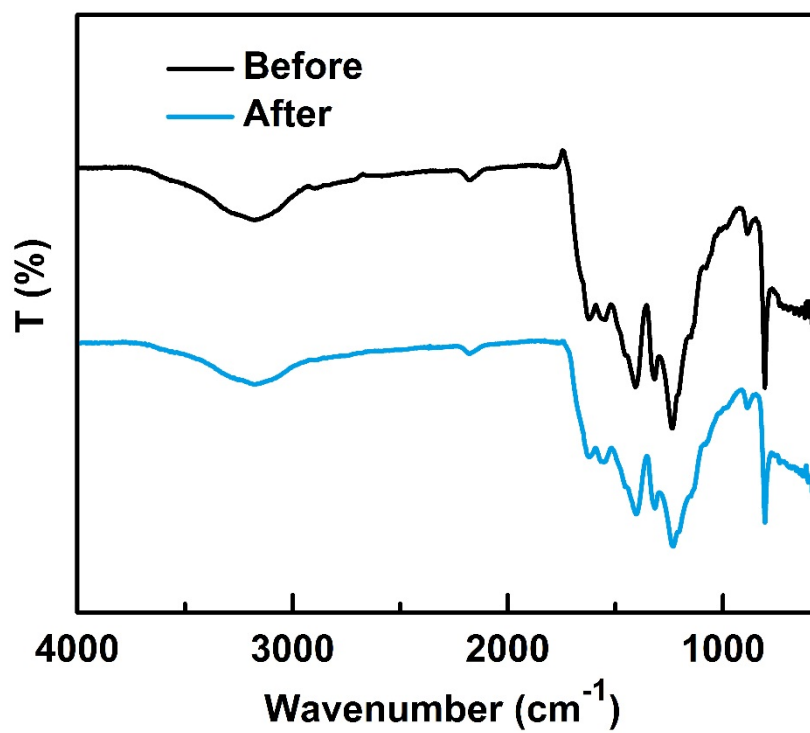

**Figure S3.** FTIR spectra of mpg-C<sub>3</sub>N<sub>4</sub> before and after using in photoclicking process.

# $^1\text{H}$ NMR AND $^{13}\text{C}$ NMR SPECTRA

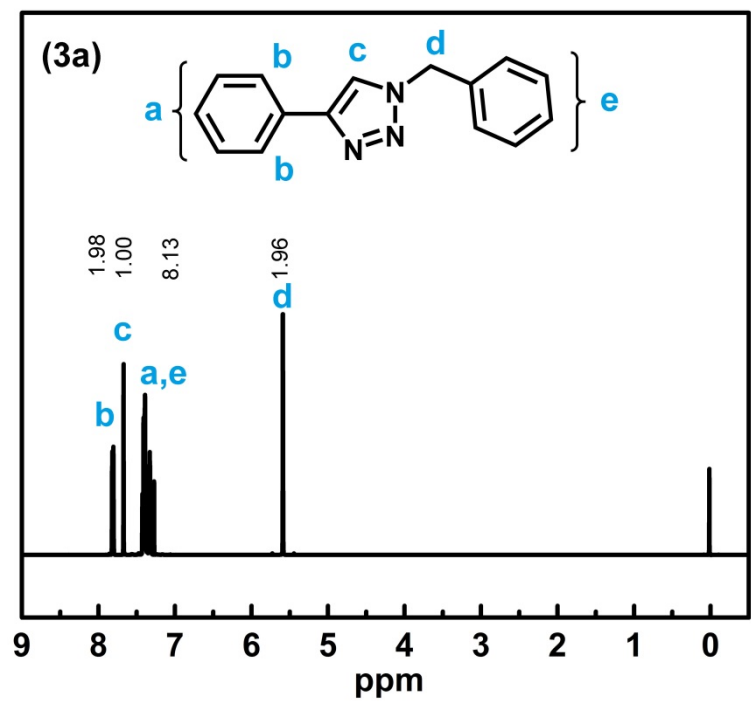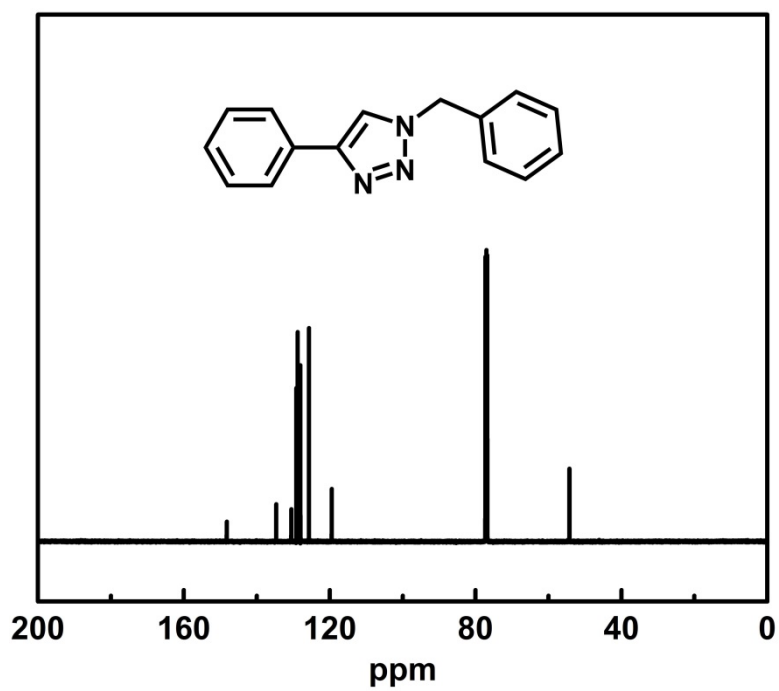



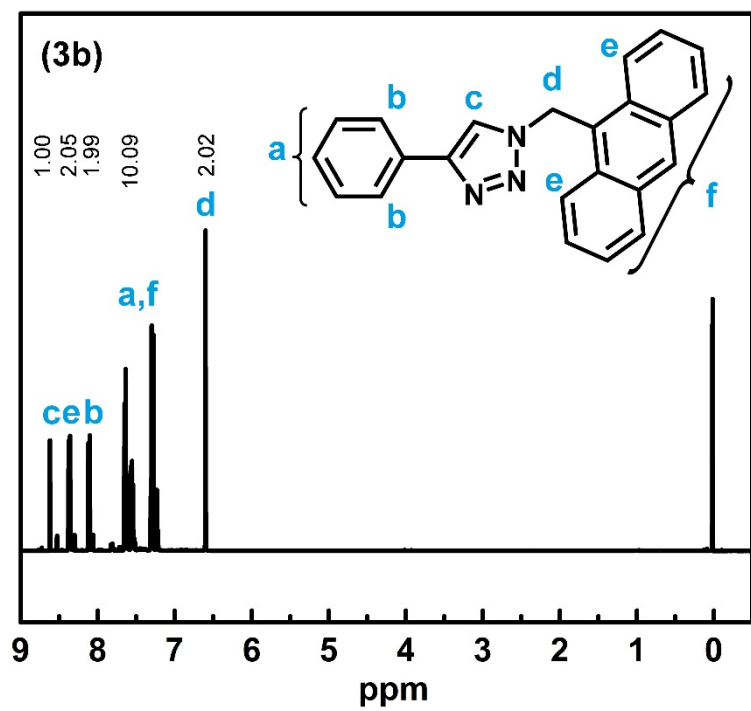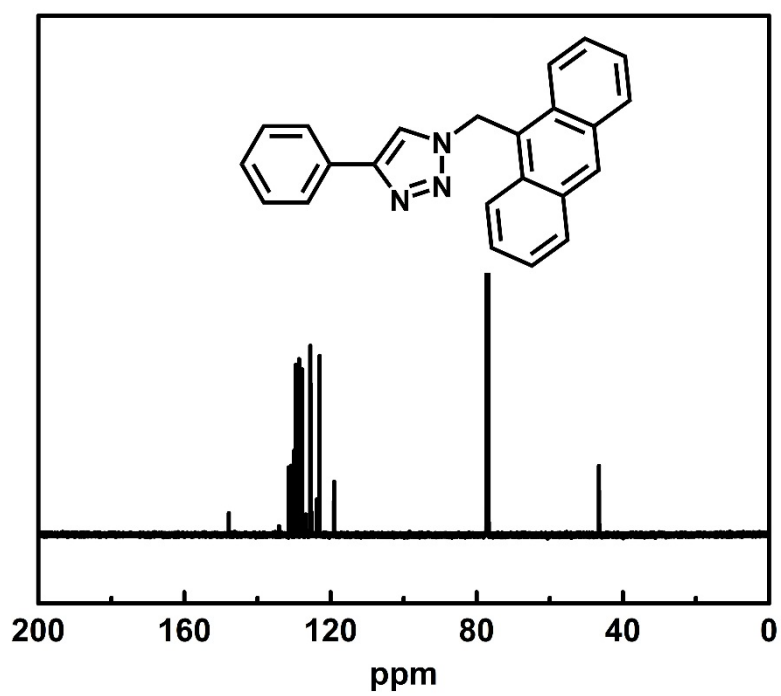

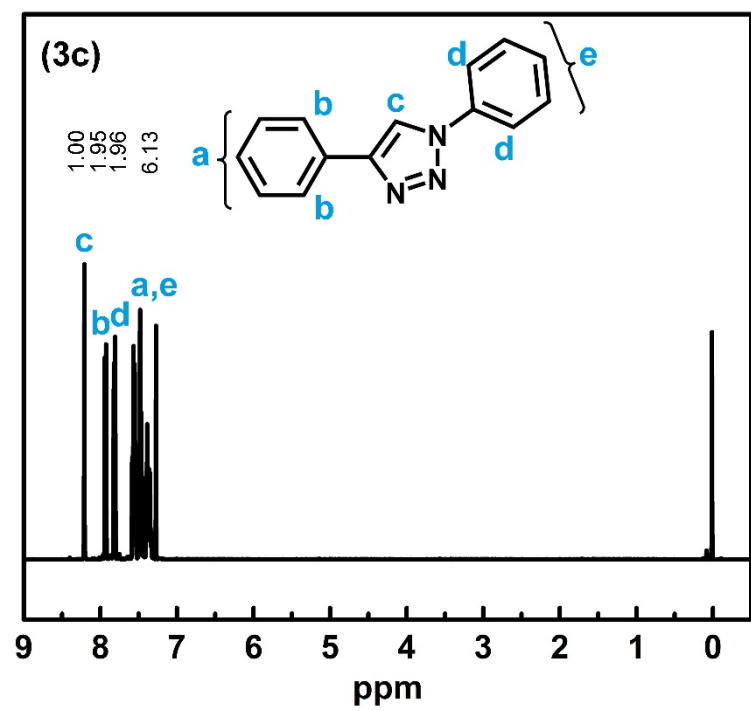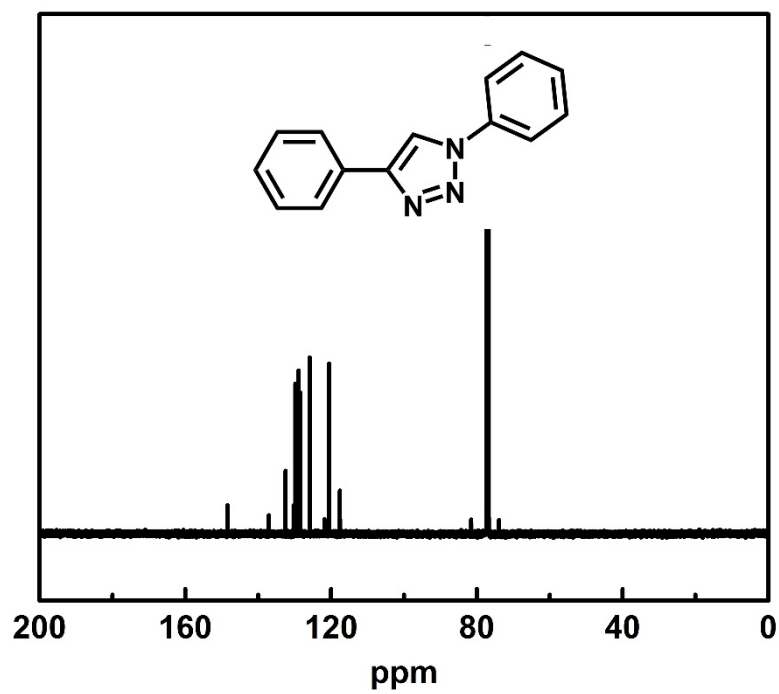

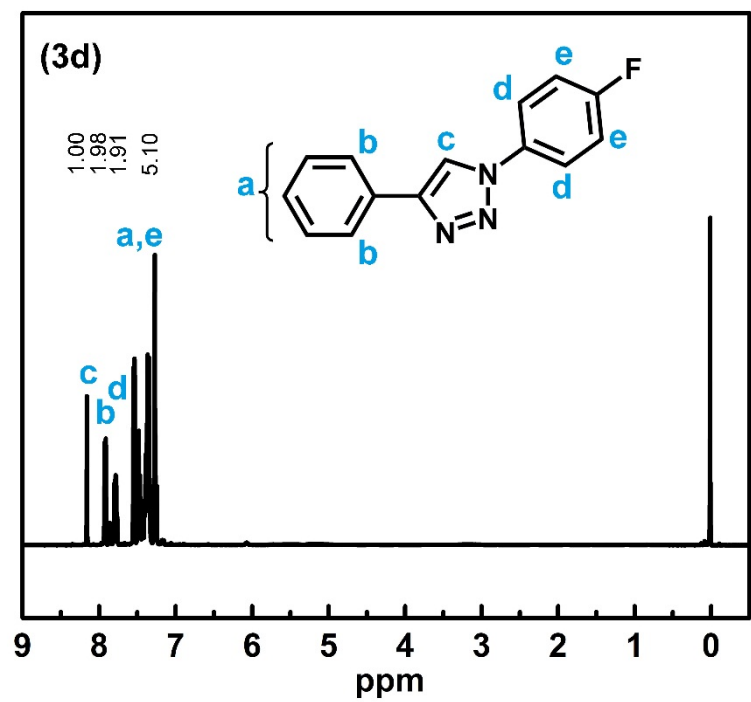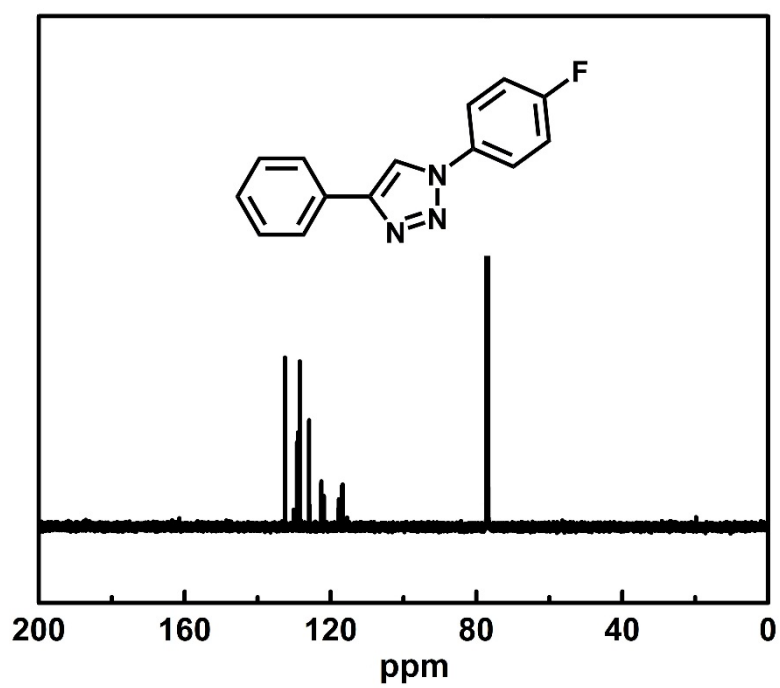

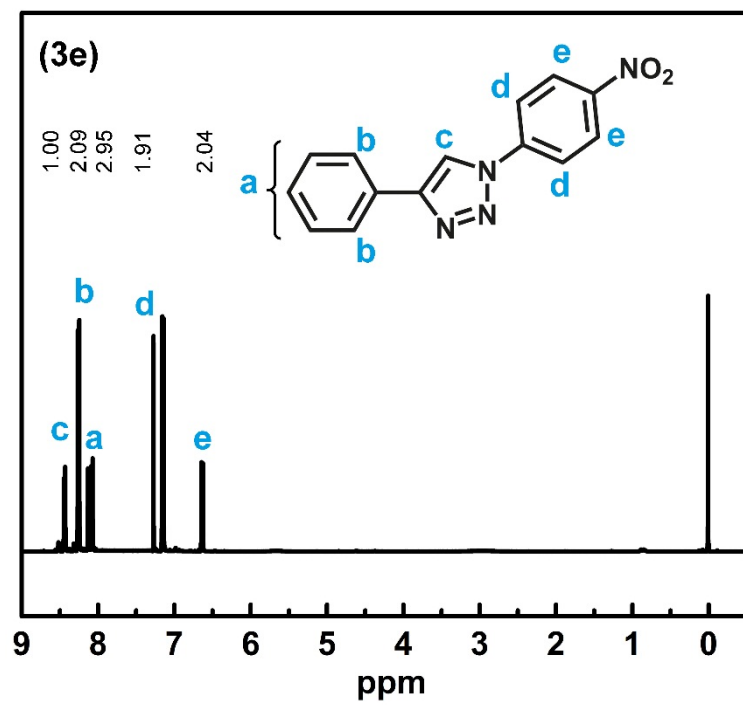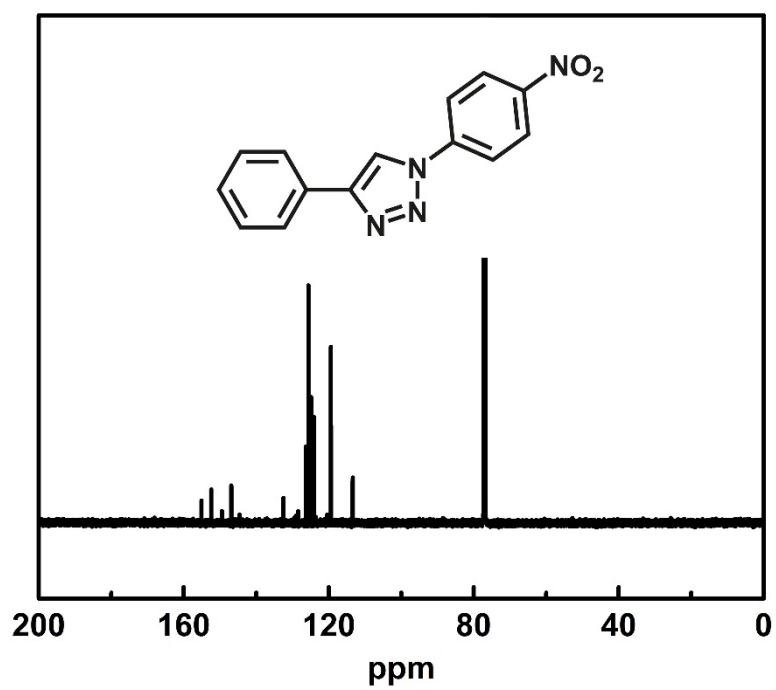

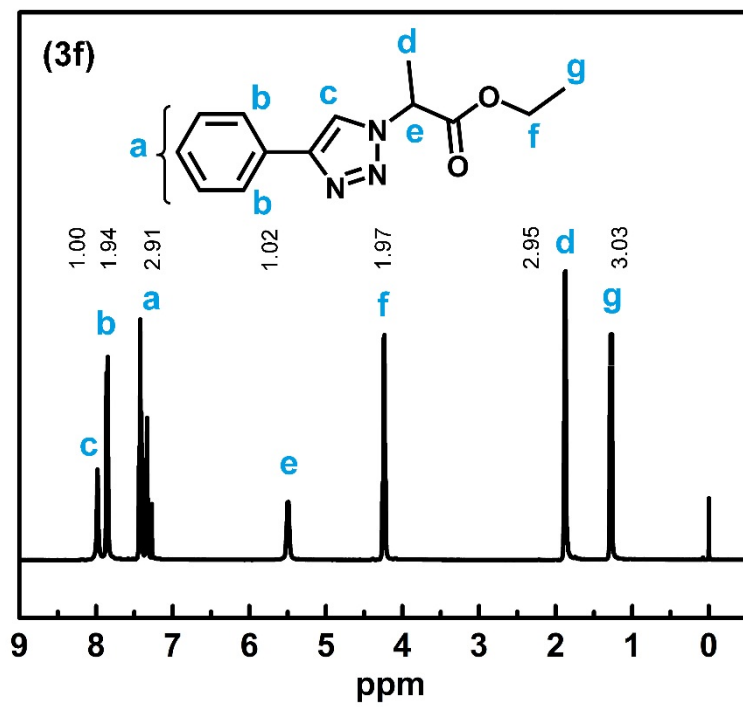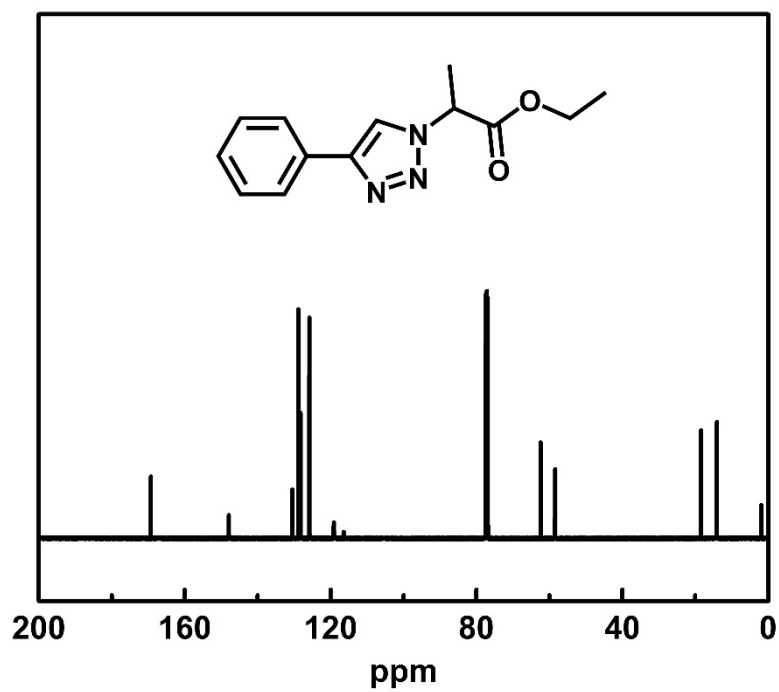

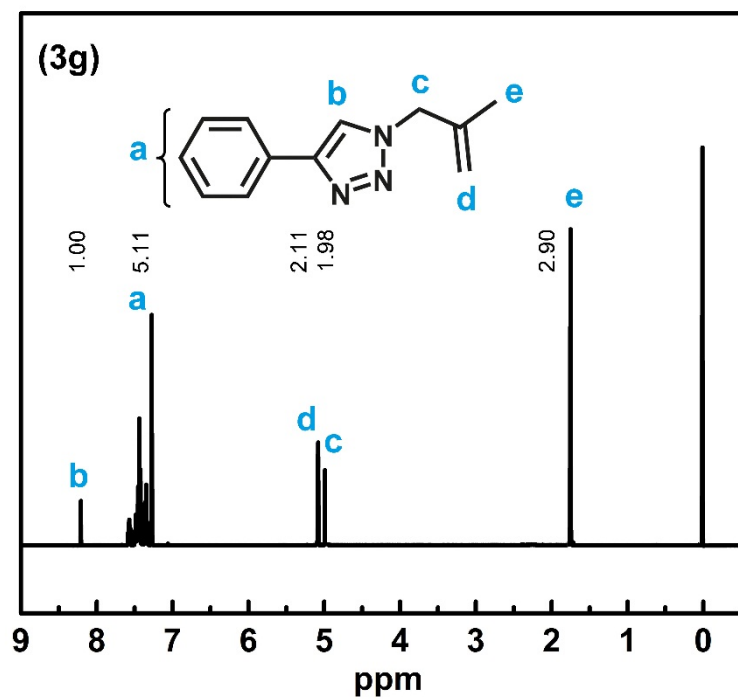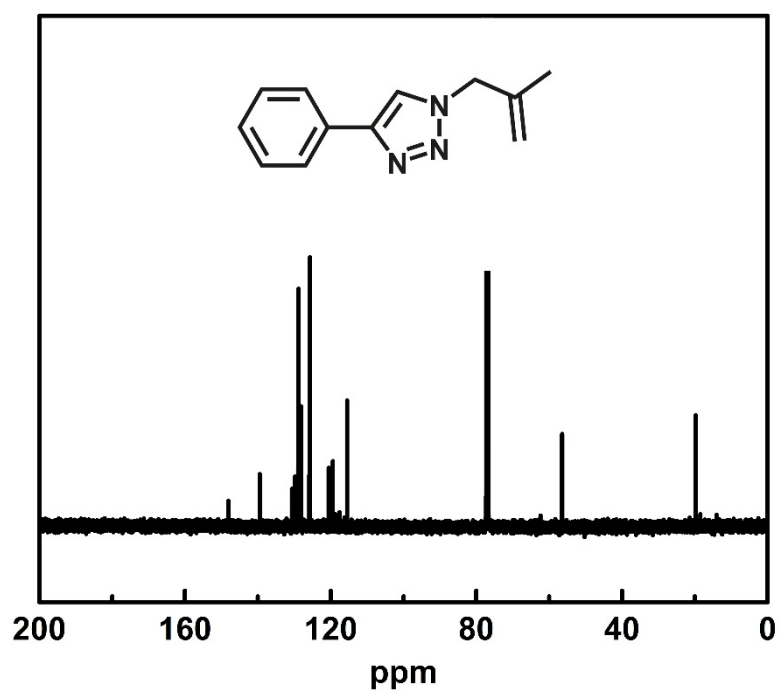

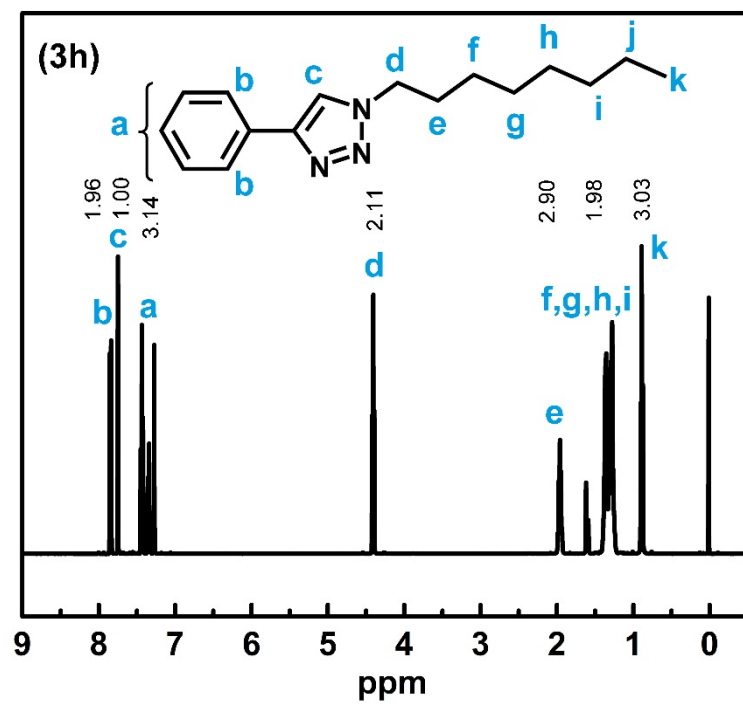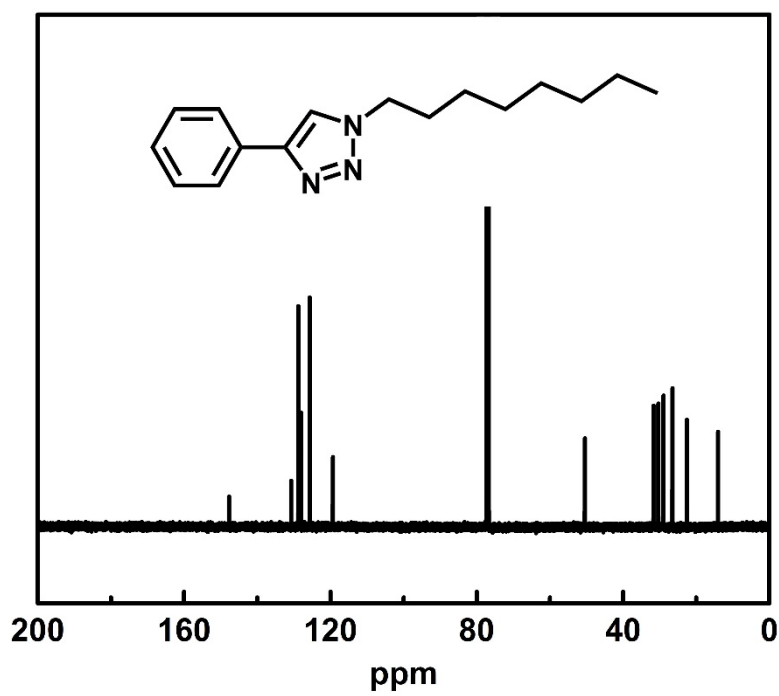

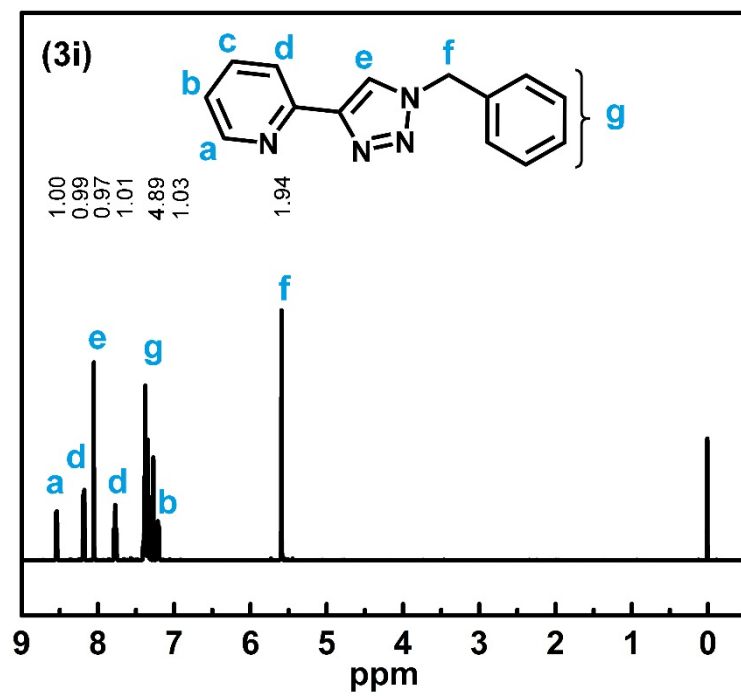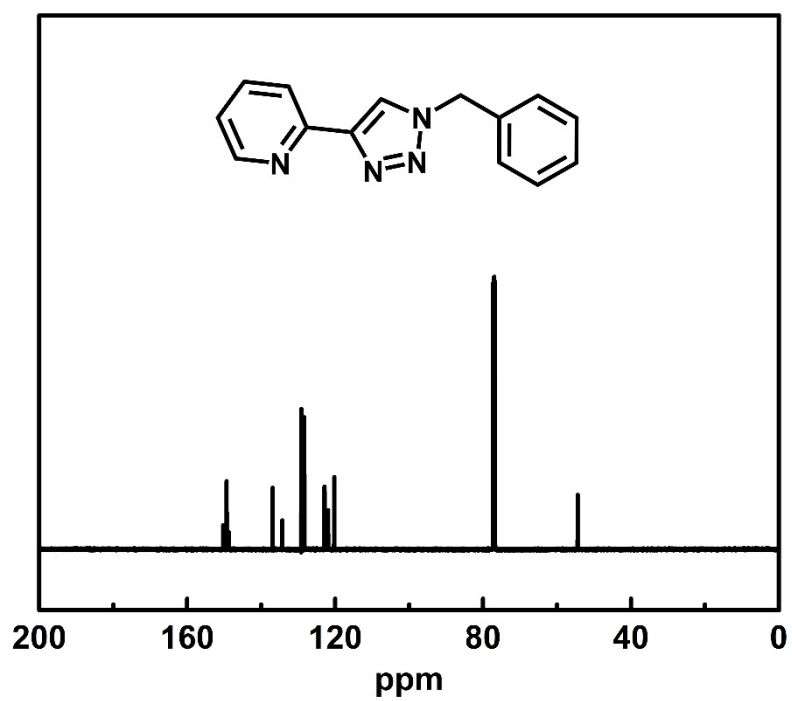



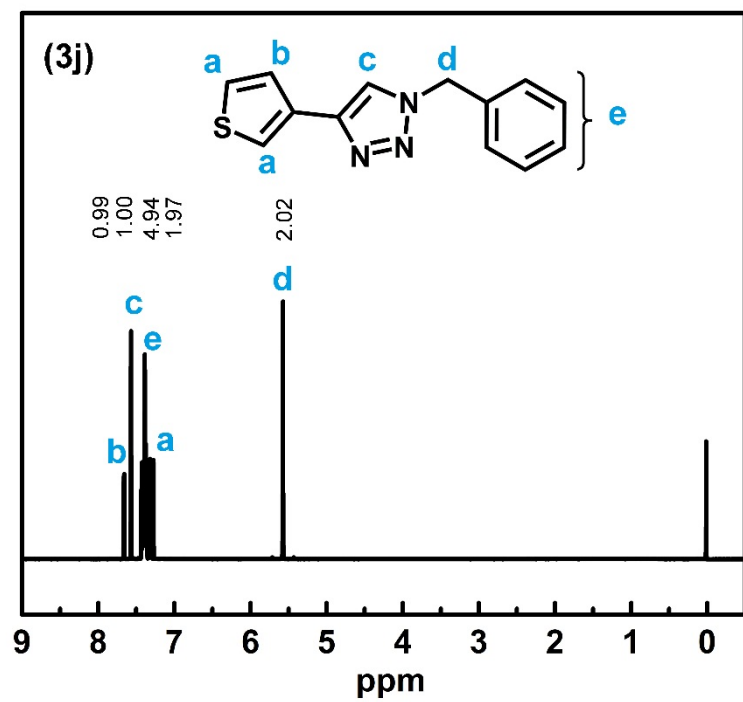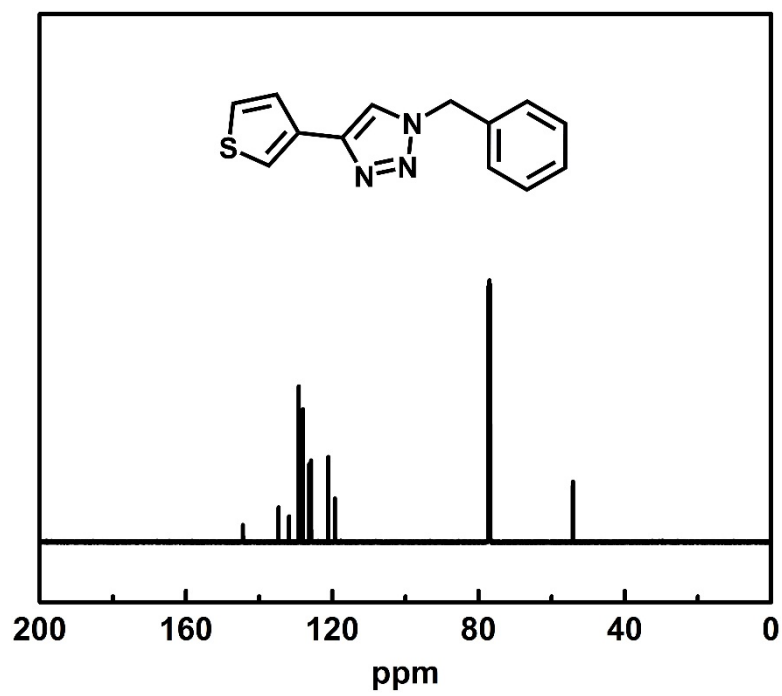

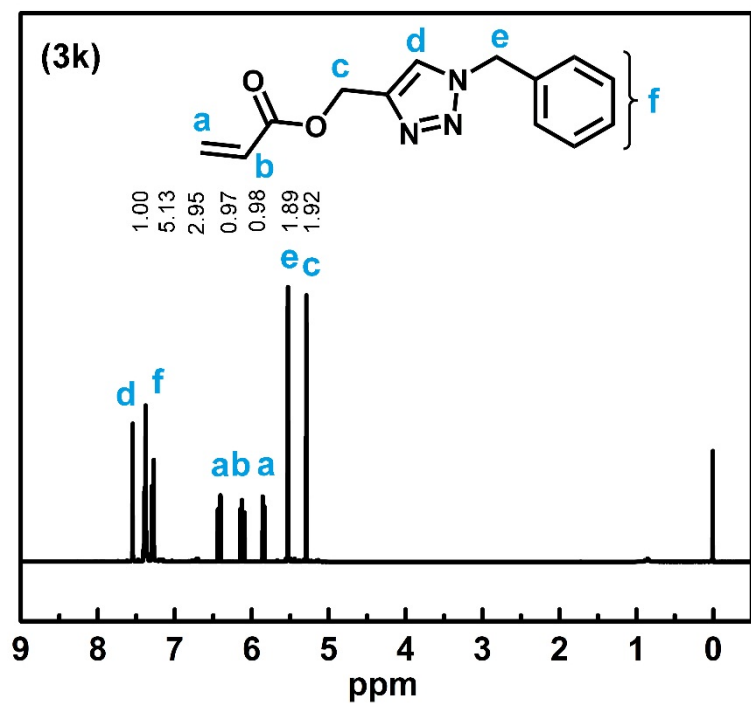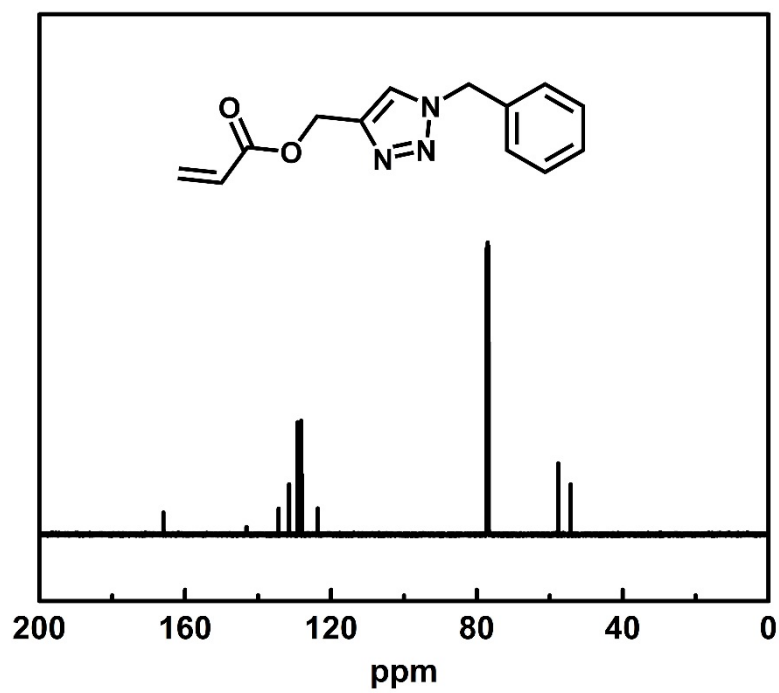

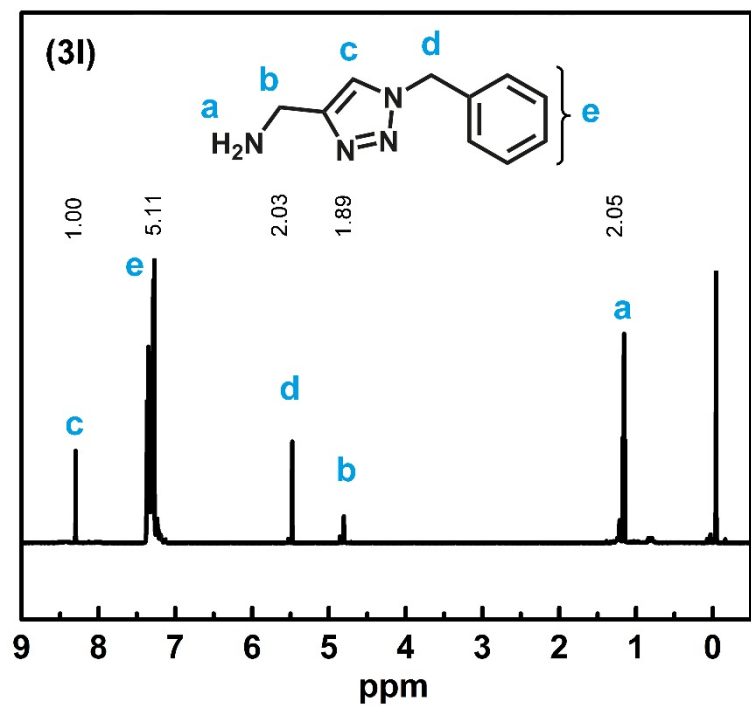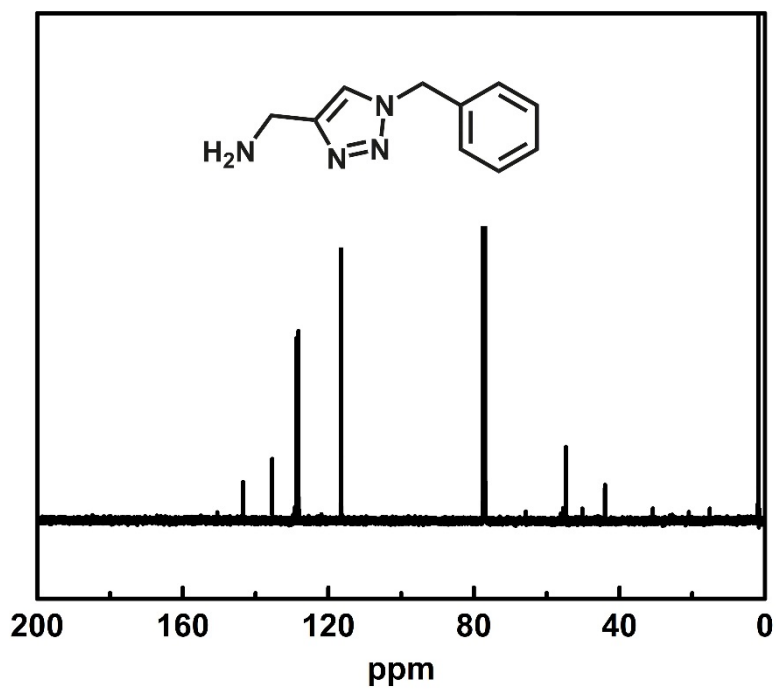

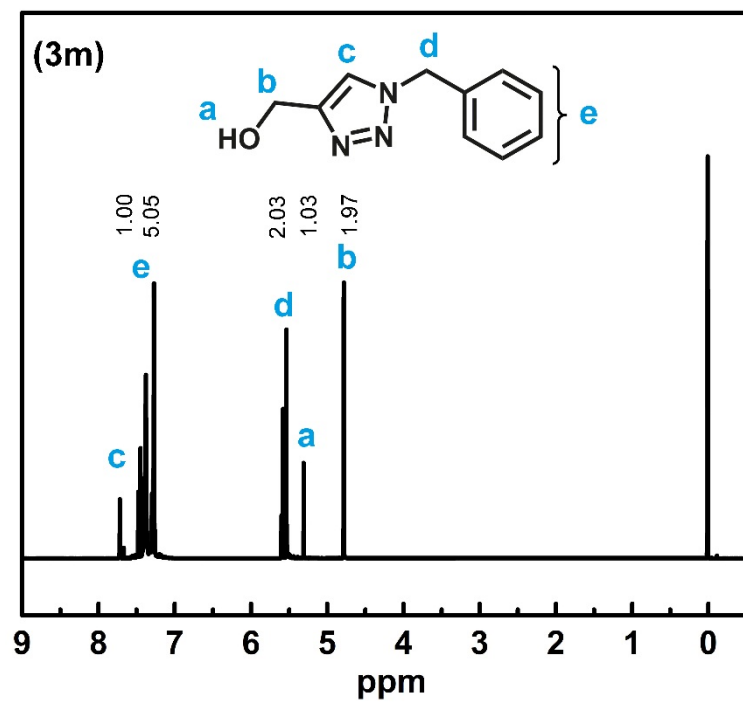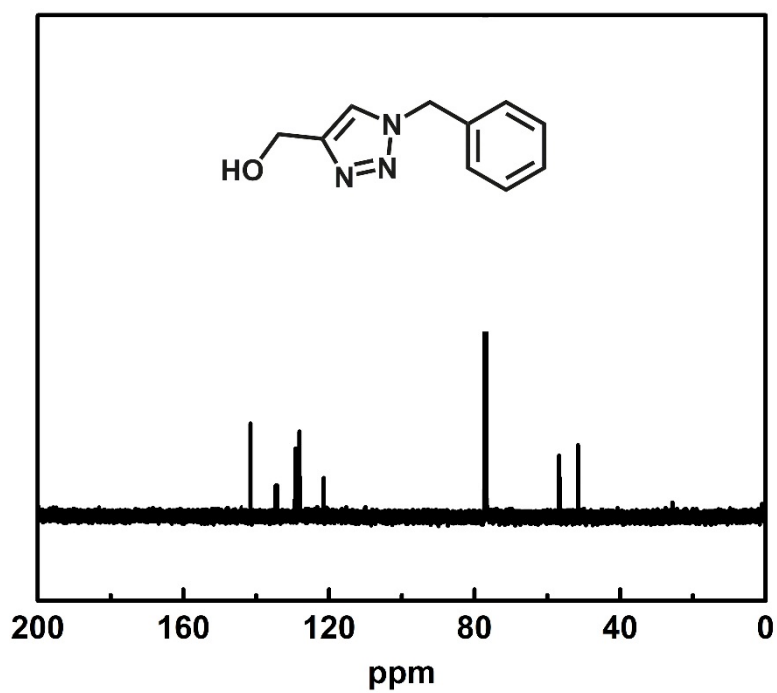

## REFERENCES

- 1 Y. Cui, J. Zhang, G. Zhang, J. Huang, P. Liu, M. Antonietti and X. Wang, *J. Mater. Chem.*, 2011, **21**, 13032.
- 2 S. G. Alvarez and M. T. Alvarez, *Synthesis-Stuttgart*, 1997, 413.
- 3 R. M. Meudtner, M. Ostermeier, R. Goddard, C. Limberg and S. Hecht, *Chem. Eur. J.*, 2007, **13**, 9834.
- 4 F. Himo, T. Lovell, R. Hilgraf, V. V. Rostovtsev, L. Noodleman, K. B. Sharpless and V. V. Fokin, *J. Am. Chem. Soc.*, 2005, **127**, 210.
